# Supplementary material
Source: Springer Nature journal article supplement (https://www.springermedizin.de/resource/supplementary/12937_2012_659_MOESM2_ESM.pdf/25653878)

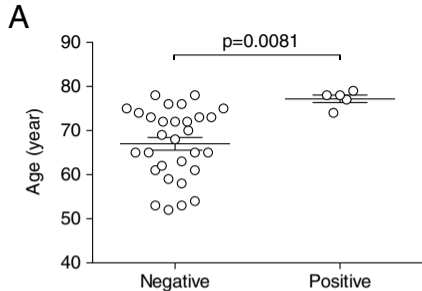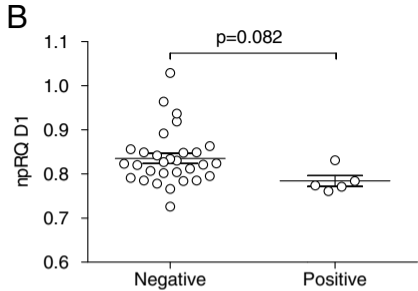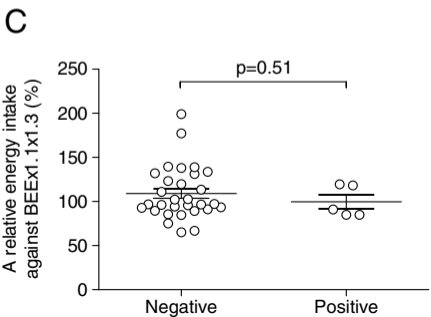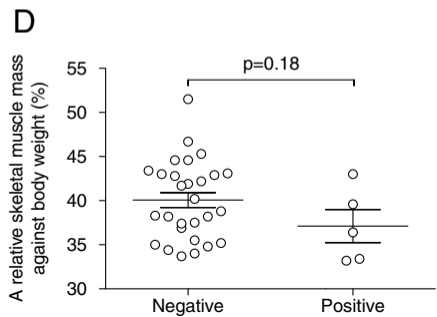

Supplement: MOESM2 [file 25653878]
